# Supplementary material for: MyoD phosphorylation on multiple C terminal sites regulates myogenic conversion activity
Source: PubMed Central journal article supplement (PMC5127879; doi:10.1016/j.bbrc.2016.11.009), 2016-12-02
Supplement: mmc1.pdf [file mmc1.pdf]

A

```
hMyoD      MELLSPLRDVLTAPDGLCSFATDDDFYDDPCFDSPLDRFFEDLDPRLMHV GALLKPE
mMyoD      MELLSPLRDIDLTPDGLCSFETADDFYDDPCFDSPLDRFFEDLDPRLVHM GALLKPE
xMyoD1     MELLPPLRDMEVT--EGSLCAFPTDDDFYDDPCFNTSDMSFFEDLDPRLVHV TLLKPEE
          ***.***:;* :***:* *.*****:..*: *****:*: * *
          *

hMyoD      EHSHFPAAVHPAPGAREDEHVRAPSGHHQAGRCLLWACKACKRKT TNADRRKAATMRER
mMyoD      EHAHFPTAVHPGPGAREDEHVRAPSGHHQAGRCLLWACKACKRKT TNADRRKAATMRER
xMyoD1     -----PHHNEDEHVRAPSGHHQAGRCLLWACKACKRKT TNADRRKAATMRER
          * .*****

hMyoD      RLSKVNEAFETLKRCTSSNPQLPKVEILRNAI RYIEGLQALLRDQD---AAPP GAA
mMyoD      RLSKVNEAFETLKRCTSSNPQLPKVEILRNAI RYIEGLQALLRDQD---AAPP-GAA
xMyoD1     RLSKVNEAFETLKRYTSTNPQLPKVEILRNAI RYIESLQSLLDHDEAFY-----
          ***** **;*****.**:**:*

hMyoD      AFYAPGPLPPGRGGEHYSGSDASSPRSNCSDGM MDYSGPPSGARRRNCYEGAYNEAPS
mMyoD      AFYAPGPLPPGRGGEHYSGSDASSPRSNCSDGM MDYSGPPSGRRQNGYDTAYSEEAR
xMyoD1     -----PVLEHYSGSDASSPRSNCSDGM MDYNSPCGSRRRNSYDSSFYSDSPN
          ***** .**.*.*:* * :*:*.

hMyoD      EPRPGKSAAVSSLDCLSSIVERISTESPAAPALLADVPSESPRRQEAAA PSEGESSGD
mMyoD      ESRPGKSAAVSSLDCLSSIVERISTDSPAAPALLADAPPESPGPPEGASLSDTEQG-T
xMyoD1     D SRLGKSSVSSLDCLSSIVERISTQSPSCPVP TAVDSGSEGPSPLQGETLSERVITI
          :.* **;.*****:*.*. * .*.

hMyoD      PTQSPDAAPQCPAGANPNPIYQVL
mMyoD      QTPSPDAAPQCPAGSNPNAIYQVL
xMyoD1     PSPSNTCTQLSQDPSS--TIYHVL
          : * .: . . .**:**
```

Supplementary Figure 1
